# Supplementary material for: Estimating dietary exposure to polycyclic aromatic compounds from food grade plastics
Source: Royal Society of Chemistry journal article supplement (doi:10.1039/d4va00195h), 2024-12-09

## Supplemental Information

### Estimating Dietary Exposure to Polycyclic Aromatic Compounds from Food Grade Plastics

Kara B. Loudon<sup>1\*</sup> and Thane M.Z. Tomy<sup>1</sup>; Erin C. Liebrecht<sup>1</sup>; Thor Halldorson<sup>1</sup>; Zhe Xia<sup>1</sup>; Sara Sambanthan<sup>1</sup>; Duc Luong Hoang<sup>1</sup>; Nipuni Vitharana<sup>1</sup> and Gregg T. Tomy<sup>1\*</sup>

1. Department of Chemistry, University of Manitoba, Winnipeg, Manitoba R3T 2N2 Canada

\*To whom correspondence may be addressed: [loudonk@myumanitoba.ca](mailto:loudonk@myumanitoba.ca); [gregg.tomy@myumanitoba.ca](mailto:gregg.tomy@myumanitoba.ca)

**Table SI-1.** Arithmetic mean recoveries and relative standard deviations (RSD) of replicate measurements of deuterated polycyclic aromatic compounds in 1 g of oil from our refrigeration studies.

| Plastic type                                      | PE   |         |      |         |                             | PETG |         |       |         |                             | PC   |         |      |         |                             | PP   |         |       |         |                             |
|---------------------------------------------------|------|---------|------|---------|-----------------------------|------|---------|-------|---------|-----------------------------|------|---------|------|---------|-----------------------------|------|---------|-------|---------|-----------------------------|
|                                                   | t0   |         | t10  |         | <i>p</i> value <sup>1</sup> | t0   |         | t10   |         | <i>p</i> value <sup>1</sup> | t0   |         | t10  |         | <i>p</i> value <sup>1</sup> | t0   |         | t10   |         | <i>p</i> value <sup>1</sup> |
|                                                   | Avg  | RSD (%) | Avg  | RSD (%) |                             | Avg  | RSD (%) | Avg   | RSD (%) |                             | Avg  | RSD (%) | Avg  | RSD (%) |                             | Avg  | RSD (%) | Avg   | RSD (%) |                             |
| d <sub>10</sub> -Acenaphthene                     | 65.0 | 3.1     | 65.3 | 6.2     | 0.958                       | 66.7 | 7.0     | 65.5  | 5.9     | 0.657                       | 65.9 | 2.1     | 61.0 | 6.9     | 0.165                       | 68.9 | 4.6     | 62.8  | 5.3     | 0.003                       |
| d <sub>8</sub> -Acenaphthylene                    | 62.0 | 2.0     | 62.5 | 6.6     | 0.904                       | 63.9 | 6.3     | 62.7  | 6.6     | 0.517                       | 63.6 | 2.9     | 58.8 | 7.4     | 0.200                       | 65.9 | 5.7     | 61.4  | 6.2     | 0.003                       |
| d <sub>12</sub> -Benz[ <i>a</i> ]anthracene       | 62.8 | 2.3     | 67.7 | 5.0     | 0.107                       | 66.0 | 2.6     | 83.0  | 8.0     | 0.063                       | 66.7 | 3.9     | 76.1 | 11.0    | 0.335                       | 66.6 | 7.6     | 84.8  | 3.4     | 0.013                       |
| d <sub>12</sub> -Benzo[ <i>a</i> ]pyrene          | 71.0 | 0.9     | 83.7 | 3.8     | 0.041                       | 70.0 | 4.0     | 102.2 | 11.7    | 0.082                       | 72.7 | 4.5     | 99.5 | 10.8    | 0.087                       | 67.8 | 8.0     | 110.7 | 4.2     | 0.001                       |
| d <sub>12</sub> -Benzo[ <i>b</i> ]fluoranthene    | 64.5 | 0.5     | 67.6 | 6.1     | 0.412                       | 61.5 | 4.8     | 83.8  | 9.6     | 0.089                       | 65.0 | 5.3     | 82.8 | 11.5    | 0.175                       | 63.1 | 12.9    | 90.4  | 5.3     | 0.007                       |
| d <sub>14</sub> -Benzo[ <i>g,h,i</i> ]perylene    | 63.9 | 0.7     | 77.1 | 1.6     | 0.002                       | 63.2 | 2.3     | 89.2  | 8.1     | 0.036                       | 69.0 | 2.7     | 83.5 | 8.1     | 0.135                       | 67.6 | 5.9     | 91.6  | 2.9     | 0.013                       |
| d <sub>12</sub> -Benzo[ <i>k</i> ]fluoranthene    | 62.2 | 3.2     | 68.5 | 5.8     | 0.186                       | 62.8 | 9.7     | 79.2  | 7.9     | 0.160                       | 60.7 | 3.6     | 83.3 | 11.6    | 0.073                       | 59.1 | 4.7     | 91.6  | 5.9     | 0.007                       |
| d <sub>12</sub> -Chrysene                         | 63.6 | 4.0     | 64.9 | 3.9     | 0.295                       | 65.9 | 3.6     | 75.2  | 7.3     | 0.140                       | 64.8 | 2.7     | 69.1 | 6.7     | 0.298                       | 65.2 | 5.5     | 77.4  | 5.4     | 0.002                       |
| d <sub>14</sub> -Dibenzo[ <i>a,h</i> ]anthracene  | 61.3 | 3.5     | 83.2 | 2.5     | 0.000                       | 64.3 | 3.0     | 99.0  | 11.8    | 0.052                       | 69.0 | 2.0     | 92.2 | 11.1    | 0.099                       | 66.6 | 5.3     | 98.2  | 2.8     | 0.005                       |
| d <sub>10</sub> -Fluoranthene                     | 64.5 | 4.6     | 64.0 | 2.2     | 0.718                       | 64.9 | 6.5     | 70.7  | 7.4     | 0.173                       | 65.7 | 2.5     | 66.1 | 8.1     | 0.945                       | 66.4 | 6.2     | 70.2  | 4.2     | 0.050                       |
| d <sub>10</sub> -Fluorene                         | 63.9 | 2.9     | 64.9 | 4.9     | 0.797                       | 66.8 | 5.9     | 66.4  | 6.5     | 0.753                       | 64.8 | 2.5     | 61.7 | 8.1     | 0.426                       | 67.1 | 4.0     | 64.2  | 4.1     | 0.015                       |
| d <sub>12</sub> -Indeno[1,2,3- <i>c,d</i> ]pyrene | 64.4 | 1.2     | 82.1 | 1.8     | 0.001                       | 66.3 | 5.9     | 97.8  | 8.4     | 0.031                       | 69.6 | 3.6     | 90.8 | 11.0    | 0.116                       | 66.3 | 5.3     | 97.6  | 2.7     | 0.004                       |
| d <sub>8</sub> -Naphthalene                       | 61.9 | 3.1     | 58.4 | 8.4     | 0.548                       | 60.7 | 8.7     | 58.2  | 7.7     | 0.288                       | 62.5 | 2.1     | 51.4 | 8.1     | 0.060                       | 66.3 | 3.2     | 58.1  | 6.6     | 0.021                       |
| d <sub>10</sub> -Phenanthrene                     | 64.5 | 3.7     | 64.4 | 1.3     | 0.968                       | 66.6 | 4.3     | 67.8  | 8.1     | 0.696                       | 65.6 | 1.1     | 63.1 | 7.9     | 0.570                       | 66.3 | 4.0     | 65.9  | 4.4     | 0.338                       |
| d <sub>10</sub> -Pyrene                           | 67.7 | 2.4     | 67.9 | 2.6     | 0.890                       | 68.6 | 6.7     | 76.5  | 7.1     | 0.094                       | 68.3 | 3.6     | 70.4 | 8.5     | 0.545                       | 69.5 | 6.0     | 75.7  | 5.2     | 0.040                       |

<sup>1</sup>double tail, paired student t-test

**Table SI-2.** Arithmetic mean amounts (pg) and standard deviations (SDs) of replicate measurements of polycyclic aromatic hydrocarbons in procedural blanks ( $n=5$ ) from our microwave migration study. Recoveries are the arithmetic mean  $\pm$  SD of corresponding mass-labeled internal standard in all samples ( $n=80$ ).

| <b>Compound</b>                  | <b>pg</b>        | <b>Mean + 3 <math>\times</math> SD<sup>1</sup></b> | <b>Recovery</b> |
|----------------------------------|------------------|----------------------------------------------------|-----------------|
| Acenaphthene                     | 7.0 $\pm$ 1.3    | 10.9                                               | 82.2 $\pm$ 15.6 |
| Acenaphthylene                   | 22.8 $\pm$ 3.2   | 32.5                                               | 69.8 $\pm$ 14.9 |
| Anthracene                       | 8.5 $\pm$ 1.6    | 13.5                                               | _2              |
| Benz( <i>a</i> )anthracene       | 2.0 $\pm$ 0.4    | 3.2                                                | 86.2 $\pm$ 13.2 |
| Benzo( <i>a</i> )pyrene          | 0.5 $\pm$ 0.1    | 0.9                                                | 90.6 $\pm$ 16.3 |
| Benzo( <i>b</i> )fluoranthene    | 1.3 $\pm$ 0.2    | 2.0                                                | 87.7 $\pm$ 13.1 |
| Benzo( <i>g,h,i</i> )perylene    | 0.7 $\pm$ 0.1    | 1.1                                                | 80.5 $\pm$ 11.0 |
| Benzo( <i>k</i> )fluoranthene    | 1.9 $\pm$ 0.4    | 3.0                                                | 84.4 $\pm$ 13.9 |
| Chrysene                         | 9.4 $\pm$ 1.8    | 14.8                                               | 84.3 $\pm$ 13.6 |
| Dibenzo( <i>a,h</i> )anthracene  | 0.3 $\pm$ 0.1    | 0.7                                                | 71.8 $\pm$ 15.2 |
| Fluoranthene                     | 28.9 $\pm$ 5.6   | 45.6                                               | 90.9 $\pm$ 12.1 |
| Fluorene                         | 15.6 $\pm$ 3.1   | 24.9                                               | 84.4 $\pm$ 8.9  |
| Indeno(1,2,3- <i>c,d</i> )pyrene | 1.4 $\pm$ 0.2    | 2.1                                                | 81.6 $\pm$ 11.5 |
| Naphthalene                      | 78.4 $\pm$ 11.5  | 112.9                                              | 61.9 $\pm$ 20.2 |
| Phenanthrene                     | 140.4 $\pm$ 21.6 | 205.1                                              | 89.2 $\pm$ 8.6  |
| Pyrene                           | 29.0 $\pm$ 3.7   | 40.0                                               | 90.9 $\pm$ 12.7 |

<sup>1</sup>If our analytes in samples were smaller than their respective mean + 3  $\times$  SD amounts then it was considered a non-detect. <sup>2</sup>Mass labeled anthracene was purposely not added as a recovery internal standard because it was used as an instrument performance standard.

**Table SI-3.** Arithmetic mean amounts (pg) and standard deviations of replicate measurements of alkylated polycyclic aromatic compounds in procedural blanks from our refrigeration ( $n=30$ ) and microwave ( $n=5$ ) migration studies<sup>1</sup>.

| Compound                   | Mean amount $\pm$ SD (pg) <sup>2</sup> | Mean + 3 $\times$ SD (pg) <sup>3</sup> |
|----------------------------|----------------------------------------|----------------------------------------|
| 1,7-Dimethylphenanthrene   | 9.3 $\pm$ 1.6; 5.5 $\pm$ 1.0           | 14.1; 8.5                              |
| 1,8-Dimethylphenanthrene   | 1.3 $\pm$ 0.3; 1.3 $\pm$ 0.9           | 2.2; 4.0                               |
| 1-Methylnaphthalene        | 8.6 $\pm$ 1.9; 14.8 $\pm$ 2.2          | 14.2; 21.3                             |
| 1-Methylphenanthrene       | 16.6 $\pm$ 3.8; 10.9 $\pm$ 2.2         | 27.8; 17.5                             |
| 2,6-Dimethylphenanthrene   | 4.8 $\pm$ 0.9; 3.1 $\pm$ 0.6           | 7.6; 4.9                               |
| 2-Methylnaphthalene        | 13.1 $\pm$ 2.5; 23.7 $\pm$ 3.2         | 20.7; 33.3                             |
| 2-Methylphenanthrene       | 22.2 $\pm$ 5.4; 13.5 $\pm$ 2.4         | 38.5; 20.6                             |
| 3,6-Dimethylphenanthrene   | 8.6 $\pm$ 1.8; 6.0 $\pm$ 0.8           | 14.1; 8.5                              |
| 3-Methylphenanthrene       | 18.1 $\pm$ 4.2; 14.4 $\pm$ 2.7         | 30.8; 22.4                             |
| 9/4-Methylphenanthrene     | 13.9 $\pm$ 3.4; 9.1 $\pm$ 1.7          | 24.3; 14.4                             |
| C2-Naphthalene             | 26.1 $\pm$ 3.8; 43.9 $\pm$ 5.2         | 37.4; 59.5                             |
| C3-Naphthalene             | 28.1 $\pm$ 6.3; 58.5 $\pm$ 10.6        | 47.1; 90.3                             |
| C4-Naphthalene             | 25.6 $\pm$ 5.6; 30.4 $\pm$ 5.3         | 42.6; 46.3                             |
| C2-Phenanthrene            | 42.3 $\pm$ 7.4; 32.9 $\pm$ 6.3         | 64.6; 51.7                             |
| C3-Phenanthrene            | 58.7 $\pm$ 14.0; 27.9 $\pm$ 7.9        | 100.7; 51.7                            |
| C4-Phenanthrene            | 14.6 $\pm$ 3.3; 8.6 $\pm$ 2.1          | 24.6; 15.0                             |
| C1-Chrysene                | 6.8 $\pm$ 1.6; 3.8 $\pm$ 0.5           | 11.6; 5.3                              |
| C2-Chrysene                | 29.6 $\pm$ 5.6; 24.4 $\pm$ 4.7         | 46.5; 38.4                             |
| C3-Chrysene                | 4.0 $\pm$ 0.7; 4.3 $\pm$ 1.0           | 6.2; 7.4                               |
| C4-Chrysene                | 4.2 $\pm$ 0.9; 4.1 $\pm$ 0.9           | 7.0; 7.0                               |
| Retene                     | 11.0 $\pm$ 2.6; 5.9 $\pm$ 1.2          | 18.9; 9.5                              |
| C1-Benzo( <i>a</i> )pyrene | 6.8 $\pm$ 1.4; 1.4 $\pm$ 0.3           | 11.0; 2.3                              |
| C2-Benzo( <i>a</i> )pyrene | 19.0 $\pm$ 4.6; 16.8 $\pm$ 3.4         | 32.9; 27.1                             |
| Dibenzothiophene           | 20.8 $\pm$ 3.7; 14.5 $\pm$ 1.9         | 32.0; 20.1                             |
| C1-Dibenzothiophene        | 69.9 $\pm$ 10.2; 54.3 $\pm$ 8.2        | 100.5; 78.8                            |
| C2-Dibenzothiophene        | 129.1 $\pm$ 23.1; 106.1 $\pm$ 19.7     | 198.3; 165.3                           |
| C3-Dibenzothiophene        | 57.8 $\pm$ 5.4; 26.7 $\pm$ 5.2         | 74.0; 42.3                             |
| C4-Dibenzothiophene        | 23.4 $\pm$ 3.3; 18.2 $\pm$ 3.4         | 33.5; 28.4                             |
| C1-Fluorene                | 58.9 $\pm$ 11.0; 30.1 $\pm$ 6.2        | 92.0; 48.4                             |
| C2-Fluorene                | 52.5 $\pm$ 9.3; 12.1 $\pm$ 2.4         | 80.4; 19.3                             |
| C3-Fluorene                | 54.0 $\pm$ 11.1; 48.2 $\pm$ 9.2        | 87.3; 75.9                             |
| C4-Fluorene                | 56.5 $\pm$ 10.7; 39.1 $\pm$ 6.9        | 88.8; 59.5                             |
| C1-Pyrene                  | 27.6 $\pm$ 3.0; 20.5 $\pm$ 3.7         | 36.6; 31.5                             |
| C2-Pyrene                  | 12.8 $\pm$ 1.9; 9.2 $\pm$ 1.8          | 18.4; 14.6                             |
| C3-Pyrene                  | 26.5 $\pm$ 6.7; 21.2 $\pm$ 4.1         | 46.6; 33.4                             |
| C4-Pyrene                  | 22.6 $\pm$ 5.0; 14.6 $\pm$ 2.7         | 37.6; 22.7                             |

<sup>1</sup> If analyte amounts in samples were smaller than their respective mean + 3 × SD then it was considered a non-detect; <sup>2</sup>First and second mean ± SD values are refrigeration and microwave, respectively; <sup>3</sup>First and second mean ± 3 × SD values are refrigeration and microwave, respectively.

**Table SI-4.** Amount of PAHs and alkylated polycyclic aromatic compounds (pg) in 1 g of oil incubated under microwave conditions<sup>1</sup>.

| <b>Analyte</b>                  | <b>PE</b>                                                             | <b>PP</b> | <b>PETG</b>                            | <b>PC</b>                             |
|---------------------------------|-----------------------------------------------------------------------|-----------|----------------------------------------|---------------------------------------|
| Acenaphthene                    | 58.0(67.3) <sup>2</sup><br>35.9(31.3) <sup>3</sup><br>75 <sup>4</sup> | nd        | nd                                     | 116.6(37.7)<br>116.6(26.7)<br>50      |
| Acenaphthylene                  | nd                                                                    | nd        | nd                                     | 138.8(152.2)<br>138.8(107.7)<br>50    |
| Benz( <i>a</i> )anthracene      | nd                                                                    | nd        | nd                                     | 52.3(35.4)<br>52.30(25.0)<br>50       |
| Benzo( <i>a</i> )pyrene         | nd                                                                    | nd        | 289.7(215.9)<br>172.4(74.7)<br>100     | nd                                    |
| Benzo( <i>b</i> )fluoranthene   | 15.3(10.9)<br>16.3(9.3)<br>75                                         | nd        | nd                                     | nd                                    |
| Benzo( <i>g,h,i</i> )perylene   | 10.6(5.5)<br>12.0(2.9)<br>100                                         | nd        | nd                                     | nd                                    |
| Chrysene                        | nd                                                                    | nd        | nd                                     | 144.8(68.0)<br>144.8(48.1)<br>50      |
| Dibenzo( <i>a,h</i> )anthracene | nd                                                                    | nd        | 82.1(63.0)<br>76.8(51.9)<br>100        | nd                                    |
| Fluoranthene                    | nd                                                                    | nd        | 2802.7(162.1)<br>2710.1(23.4)<br>75    | 283.2(58.2)<br>283.2(41.6)<br>50      |
| Fluorene                        | nd                                                                    | nd        | 683.4(22.6)<br>710.8(146.8)<br>75      | 538.1(106.8)<br>283.2(41.6)<br>50     |
| Naphthalene                     | nd                                                                    | nd        | 5183.1(806.2)<br>5124.4(799.8)<br>75   | 1056.8(1178.1)<br>1056.8(833.0)<br>50 |
| Phenanthrene                    | nd                                                                    | nd        | 4960.6(749.9)<br>4582.2(364.8)<br>75   | 545.1(123.8)<br>545.1(87.5)<br>50     |
| Pyrene                          | nd                                                                    | nd        | 2703.5(1110.8)<br>2763.2(1105.9)<br>75 | nd                                    |
| Anthracene                      | nd                                                                    | nd        | 516.7(189.8)<br>445.1(143.7)           | 253.7(246.0)<br>253.7(173.9)          |

|                           |                                       |                                      |                                      |                                        |
|---------------------------|---------------------------------------|--------------------------------------|--------------------------------------|----------------------------------------|
|                           |                                       |                                      | 75                                   | 50                                     |
| Low molecular weight PACs |                                       |                                      |                                      |                                        |
| 1-Methylnaphthalene       | nd                                    | 435.1(263.8)<br>435.1(186.5)<br>50   | nd                                   | nd                                     |
| 2-Methylnaphthalene       | 1041.0(1166.2)<br>1041.0(824.6)<br>50 | 686.7(366.8)<br>686.7(259.4)<br>50   | nd                                   | 739.6(639.6)<br>531.9(201.7)<br>100    |
| C2-Naphthalene            | 1395.0(1265.5)<br>858.8(235.5)<br>100 | 1176.7(330.9)<br>1176.7(234.0)<br>50 | nd                                   | nd                                     |
| C3-Naphthalene            | 2677.7(1269.9)<br>2063.9(43.6)<br>100 | 3869.8(67.9)<br>3869.8(48.0)<br>50   | nd                                   | 1823.2(98.9)<br>1823.2(70.0)<br>50     |
| C4-Naphthalene            | 1287.5(680.1)<br>1226.9(497.0)<br>100 | 1939.7(373.2)<br>1939.7(263.9)<br>50 | 1097.2(885.2)<br>1133.9(829.4)<br>75 | 1242.5(1174.4)<br>1111.2(840.8)<br>100 |
| 2-Methylphenanthrene      | nd                                    | 456.7(193.8)<br>456.7(137.0)<br>50   | 41.6(38.0)<br>40.6(36.5)<br>75       | nd                                     |
| 3-Methylphenanthrene      | nd                                    | 475.3(182.0)<br>475.3(128.7)         | 193.4(208.2)<br>163.9(162.3)<br>75   | nd                                     |
| 1,7-Dimethylphenanthrene  | 73.1(64.4)<br>73.1(45.5)<br>50        | nd                                   | 199.0(174.3)<br>164.0(104.2)<br>100  | 296.8(395.8)<br>296.8(279.9)<br>50     |
| 1,8-Dimethylphenanthrene  | nd                                    | nd                                   | 169.8(73.1)<br>200.4(22.2)<br>75     | 188.2(114.7)<br>170.6(68.7)<br>100     |
| 1-Methylphenanthrene      | nd                                    | 294.0(202.8)<br>294.0(143.4)<br>50   | 142.1(49.2)<br>159.6(20.6)<br>75     | nd                                     |
| 2,6-Dimethylphenanthrene  | 144.8(150.1)<br>144.8(106.2)<br>50    | 163.8(3.6)<br>163.8(2.5)<br>50       | 1238.0(242.6)<br>1313.9(75.9)<br>100 | nd                                     |
| 3,6-Dimethylphenanthrene  | nd                                    | 170.7(71.9)<br>170.7(50.8)<br>50     | 222.0(145.2)<br>274.1(59.9)<br>75    | nd                                     |
|                           |                                       |                                      |                                      |                                        |
| 9/4-Methylphenanthrene    | nd                                    | 260.9(68.8)<br>260.9(48.6)<br>50     | 94.2(86.9)<br>94.2(61.3)<br>50       | nd                                     |
| C2-Phenanthrene           | 538.2(64.4)<br>538.2(45.5)<br>50      | nd                                   | 571.3(627.5)<br>465.0(461.3)<br>75   | 1436.1(428.9)<br>1417.9(305.6)<br>100  |

|                               |                                            |                                        |                                         |                                        |
|-------------------------------|--------------------------------------------|----------------------------------------|-----------------------------------------|----------------------------------------|
| C3-Phenanthrene               | 6243.1(4231.1)<br>5125.4(1445.3)<br>100    | 809.4(88.2)<br>809.4(62.4)<br>50       | 739.7(127.7)<br>739.7(90.3)<br>75       | nd                                     |
| C4-Phenanthrene               | 992.1(544.9)<br>895.3(294.3)<br>100        | 216.4(163.1)<br>216.4(115.3)<br>50     | nd                                      | nd                                     |
| C1-Fluorene                   | 1170.3(731.7)<br>1170.3(517.4)<br>50       | nd                                     | 2351.2(22.62.9)<br>1277.8(87.2)<br>100  | nd                                     |
| C2-Fluorene                   | 791.5(183.9)<br>791.5 (130.1)<br>50        | 833.0(186.2)<br>833.0(131.7)<br>50     | 1944.3(249.1)<br>1975.5(140.3)<br>100   | nd                                     |
| C3-Fluorene                   | 2913.8(205.2)<br>2913.8(145.1)<br>50       | 1960.9(189.6)<br>1960.9(134.1)<br>50   | 5544.4(1847.8)<br>5397.0(1405.4)<br>100 | nd                                     |
| C4-Fluorene                   | 2296.3(1049.2)<br>2296.3(741.9)<br>50      | 1561.7(973.0)<br>1561.7(688.0)<br>50   | 4303.9(879.7)<br>4488.5(459.4)<br>100   | nd                                     |
| Dibenzothiophene              | 68.5(40.1)<br>68.5(28.4)<br>50             | 63.9(40.1)<br>63.9(28.3)<br>50         | 983.3(123.8)<br>1009.9(64.4)<br>100     | nd                                     |
| C1-Dibenzothiophene           | 1348.2(397.2)<br>1348.2(280.9)<br>50       | nd                                     | 3600.2(464.9)<br>3762.3(145.5)<br>100   | nd                                     |
| C2-Dibenzothiophene           | 4121.0(339.1)<br>4121.0(239.9)<br>50       | 1866.7(309.0)<br>1866.7(218.5)<br>50   | 5924.6(1334.9)<br>5813.8(899.5)<br>100  | nd                                     |
| C3-Dibenzothiophene           | 888.3 (678.4)<br>888.3 (479.7)<br>50       | 574.0(644.7)<br>574.0(455.9)<br>50     | 2428.3(625.2)<br>5397.0(1405.4)<br>100  | nd                                     |
| C4-Dibenzothiophene           | 1505.3(1554.1)<br>1505.3<br>(1098.9)<br>50 | 1250.2(1476.9)<br>1250.2(1044.3)<br>50 | 2746.9(1043.0)<br>2756.0(848.6)<br>100  | nd                                     |
| Retene                        | 1518.4(210.2)<br>1433.2(40.9)<br>100       | 130.1(129.4)<br>130.1(91.5)<br>50      | 560.1(287.2)<br>666.9(111.7)<br>75      | nd                                     |
| High molecular weight<br>PACs |                                            |                                        |                                         |                                        |
| C1-Chrysene                   | 556.5(272.1)<br>405.2(11.6)<br>75          | nd                                     | nd                                      | 1059.3(328.8)<br>1240.2(17.7)<br>75    |
| C2-Chrysene                   | 766.5(841.2)<br>430.7(285.6)<br>75         | nd                                     | nd                                      | 4709.3(3582.4)<br>4717.6(3569.9)<br>75 |
| C3-Chrysene                   | 324.2(169.6)                               | nd                                     | 2489.2(2371.3)                          | nd                                     |



|                            |                                        |                                        |                                        |                                    |
|----------------------------|----------------------------------------|----------------------------------------|----------------------------------------|------------------------------------|
|                            | 319.7(163.2)<br>75                     |                                        | 2489.2(1676.7)<br>50                   |                                    |
| C4-Chrysene                | nd                                     | nd                                     | 1797.6(1986.0)<br>1260.4(754.7)<br>100 | 1129.4(927.2)<br>607.3(26.4)<br>75 |
| C1-Benzo( <i>a</i> )pyrene | 129.6(21.0)<br>129.6(14.8)<br>50       | 37.2(16.3)<br>37.2(11.5)<br>50         | 499.5(301.5)<br>429.8(134.9)<br>100    | 100.5(37.0)<br>100.5(26.2)<br>50   |
| C2-Benzo( <i>a</i> )pyrene | nd                                     | nd                                     | 2175.7(1439.8)<br>2391.1(927.7)<br>100 | nd                                 |
| C1-Pyrene                  | 1427.7(999.6)<br>1427.7 (706.9)<br>50  | nd                                     | 2048.4(470.6)<br>2092.4(332.2)<br>100  | nd                                 |
| C2-Pyrene                  | 807.7(14.7)<br>807.7 (10.4)<br>50      | 459.3(12.7)<br>459.3(9.0)<br>50        | 1667.9(1102.8)<br>1310.0(352.3)<br>100 | nd                                 |
| C3-Pyrene                  | 3473.2(2868.9)<br>3473.2(2028.6)<br>50 | 1757.3(2230.2)<br>1757.3(1577.0)<br>50 | 3476.3(1241.0)<br>3560.9(813.9)<br>100 | nd                                 |
| C4-Pyrene                  | 2627.5(1941.8)<br>2627.5(1373.1)<br>50 | 1322.8(1484.8)<br>1322.8(1049.9)<br>50 | 3145.6(1064.8)<br>3259.1(709.8)<br>100 | nd                                 |

<sup>1</sup>Total surface area of plastic used in each incubation was 19.36 mm<sup>2</sup> (2 × 9.68 mm<sup>2</sup>). <sup>2</sup>Arithmetic mean and standard deviation (shown in brackets); <sup>3</sup>Median and median absolute error (shown in brackets); <sup>4</sup>The frequency of detection.

**Table SI-5.** Estimated incremental lifetime cancer risk (ILCR) from exposure to PACs migrating from PE, PE, PETG and PP under refrigeration and microwave conditions.

| Compound                        | TEF <sup>1</sup> | PE                     | PC                      | PETG                    | PP                     |
|---------------------------------|------------------|------------------------|-------------------------|-------------------------|------------------------|
| <b>Refrigeration conditions</b> |                  |                        |                         |                         |                        |
| Acenaphthene                    | 0.001            | 8.7× 10 <sup>-9</sup>  |                         |                         |                        |
| Acenaphthylene                  | 0.001            |                        | 4.9× 10 <sup>-11</sup>  |                         |                        |
| C4-naphthalene                  | 0.001            | 6.9× 10 <sup>-8</sup>  | 5.6× 10 <sup>-10</sup>  | 3.3× 10 <sup>-9</sup>   | 1.6× 10 <sup>-8</sup>  |
| C4-phenanthrene                 | 0.001            |                        |                         | 1.7× 10 <sup>-9</sup>   |                        |
| C4-fluorene                     | 0.001            |                        |                         | 1.6× 10 <sup>-9</sup>   |                        |
| C4-pyrene                       | 0.001            |                        |                         | 1.1× 10 <sup>-9</sup>   |                        |
| C2-dibenzothiophene             | 0.001            | 3.2× 10 <sup>-8</sup>  |                         |                         |                        |
| <b>ΣILCR<sup>2</sup></b>        |                  | 1.1 × 10 <sup>-7</sup> | 6.1 × 10 <sup>-10</sup> | 7.8 × 10 <sup>-9</sup>  | 1.6 × 10 <sup>-8</sup> |
| <b>Microwave conditions</b>     |                  |                        |                         |                         |                        |
| Naphthalene                     | 0.001            |                        |                         | 1.5 × 10 <sup>-9</sup>  |                        |
| Phenanthrene                    | 0.001            |                        |                         | 1.4 × 10 <sup>-9</sup>  |                        |
| Fluorene                        | 0.001            |                        |                         | 2.0 × 10 <sup>-10</sup> |                        |
| Dibenzoanthracene               | 1                |                        |                         | 2.9 × 10 <sup>-7</sup>  |                        |
| Dibenzothiophene                | 0.001            |                        |                         | 2.9 × 10 <sup>-10</sup> |                        |
| 2,6-dimethylphenanthrene        | 0.001            |                        |                         | 3.6 × 10 <sup>-10</sup> |                        |
| C1-pyrene                       | 0.001            |                        |                         | 6.0 × 10 <sup>-10</sup> |                        |
| C2-fluorene                     | 0.001            |                        |                         | 5.7 × 10 <sup>-9</sup>  |                        |
| C2-dibenzothiophene             | 0.001            |                        |                         | 1.7 × 10 <sup>-9</sup>  |                        |
| C4-fluorene                     | 0.001            |                        |                         | 1.3 × 10 <sup>-9</sup>  |                        |
| C2-phenanthrene                 | 0.001            |                        | 1.3 × 10 <sup>-10</sup> |                         |                        |
| Retene                          | 0.001            | 1.0× 10 <sup>-8</sup>  |                         |                         |                        |
| <b>ΣILCR</b>                    |                  | 1.0 × 10 <sup>-8</sup> | 1.3 × 10 <sup>-10</sup> | 3.0 × 10 <sup>-7</sup>  |                        |

<sup>1</sup>Toxic equivalence factors obtained from Nisbet and LaGoy (1992) and Samburova *et al.* (2017). <sup>2</sup>Total ILCR (Σ) determined by summing ILCR values for individual PACs detected.

**Figure SI-1.** Arithmetic mean  $\pm$  standard deviation percent of mass labeled polycyclic aromatic hydrocarbons measured in oil on days 0, 0.08, 1, 4, 6, 8 and 10.

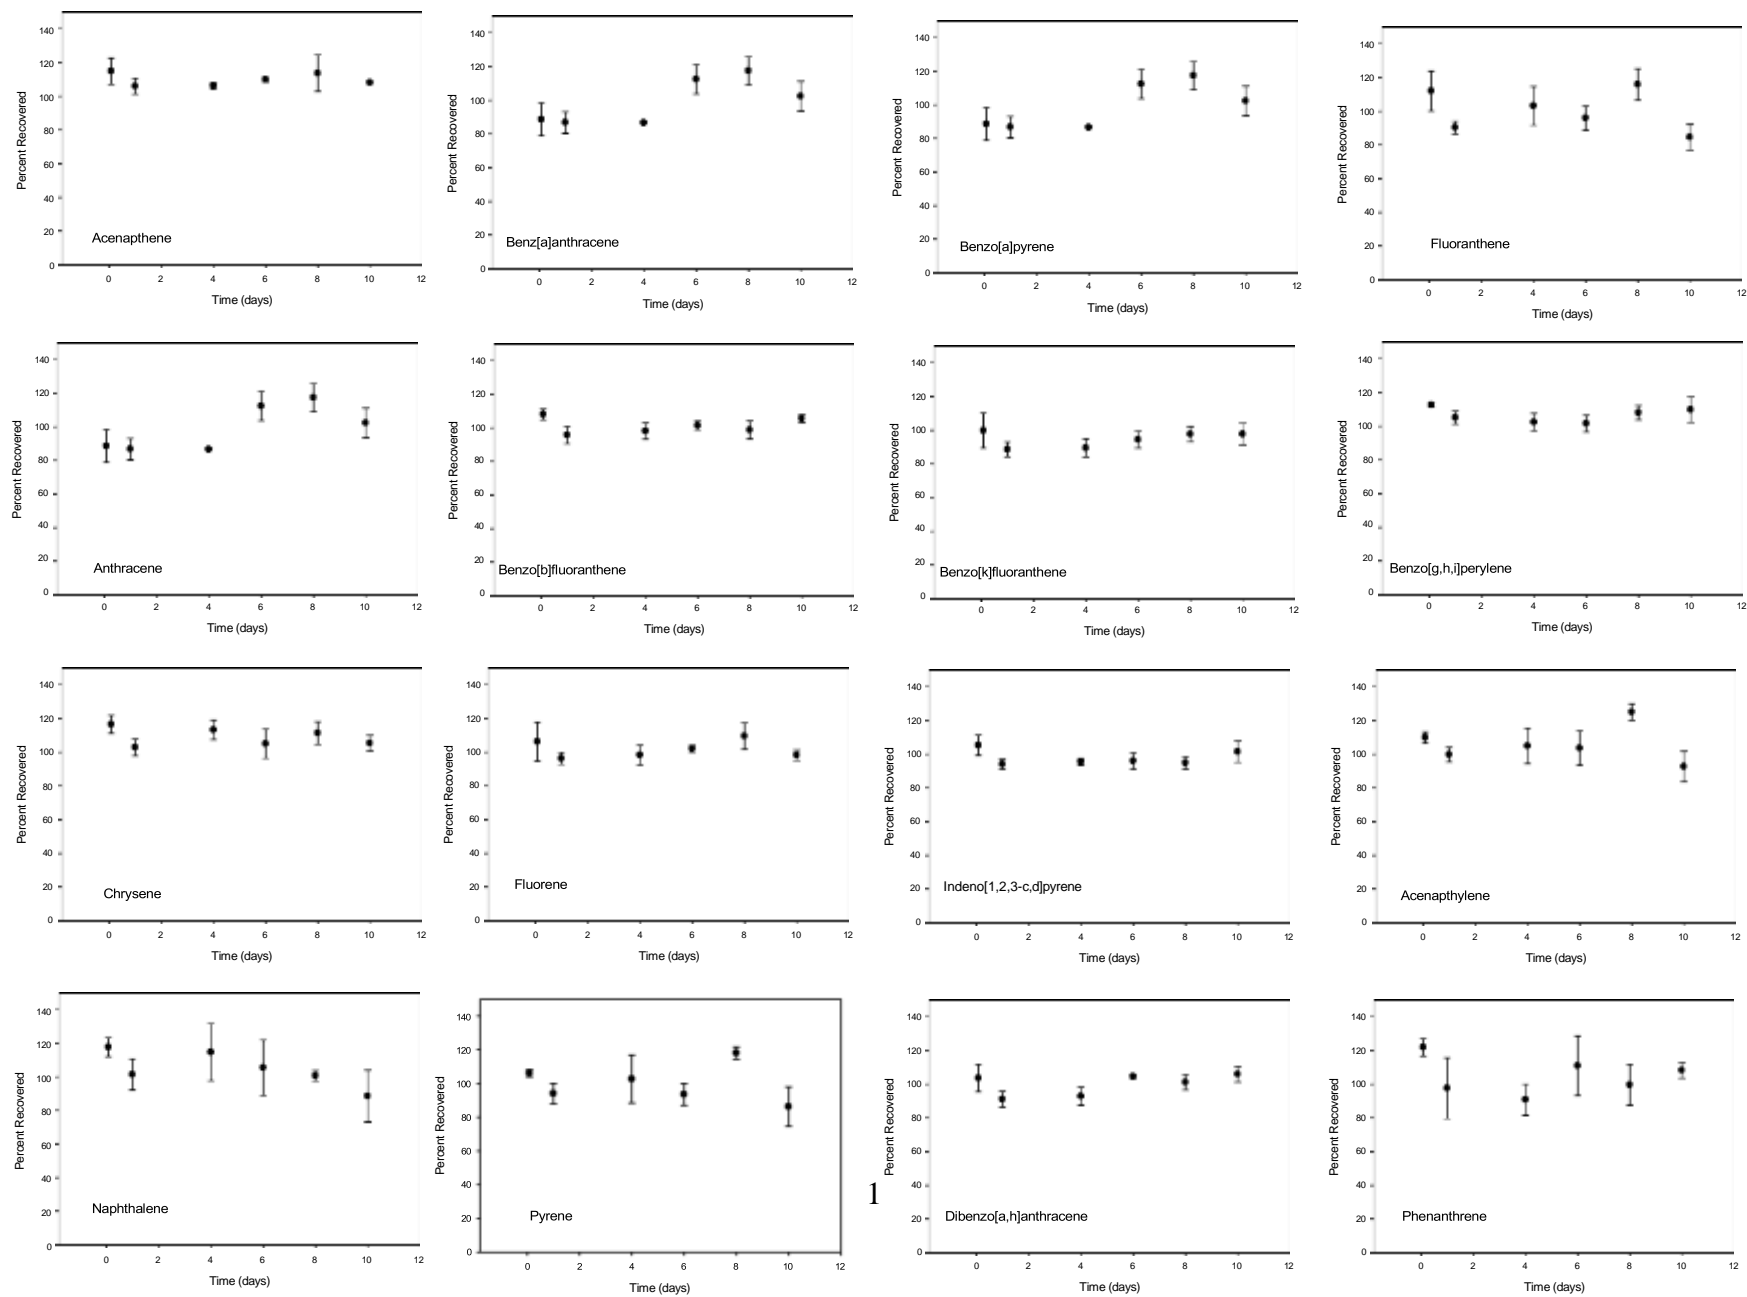

Supplement: d4va00195h1.pdf [file d4va00195h1.pdf]
